# Supplementary material for: Technical note: Precipitation phase partitioning at landscape-to-regional scales
Source: Copernicus journal article supplement (doi:10.5194/hess-2020-122), 2020-03-24
Supplement: Supplementary file 1 [file hess-2020-122-supplement.pdf]

**Below, please find two (2) supplementary figures supporting the findings reported in “Technical note: Precipitation phase partitioning at landscape-to-regional scales” by Lynn et al., submitted as a technical note to Hydrology and Earth System Sciences.**

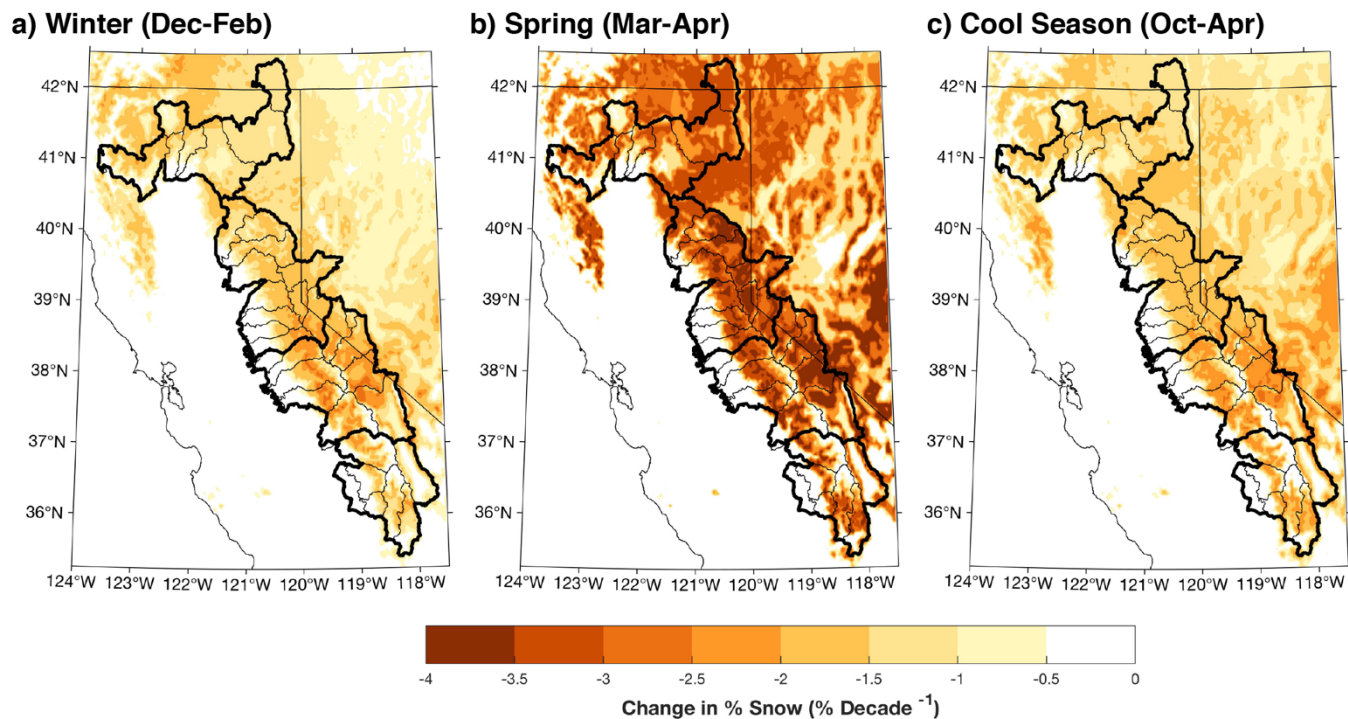

**Supplementary Figure 1: Estimated changes in %<sub>SNOW</sub> (in % decade<sup>-1</sup>) for (a) winter (Dec-Feb), (b) spring (Mar-Apr), and (c) for the full cool season (Oct-Apr) for all gridpoints. Thick black contours denote California Department of Water Resources analysis zones. Thin black contours denote United States Geological Survey HUC-8 watersheds.**

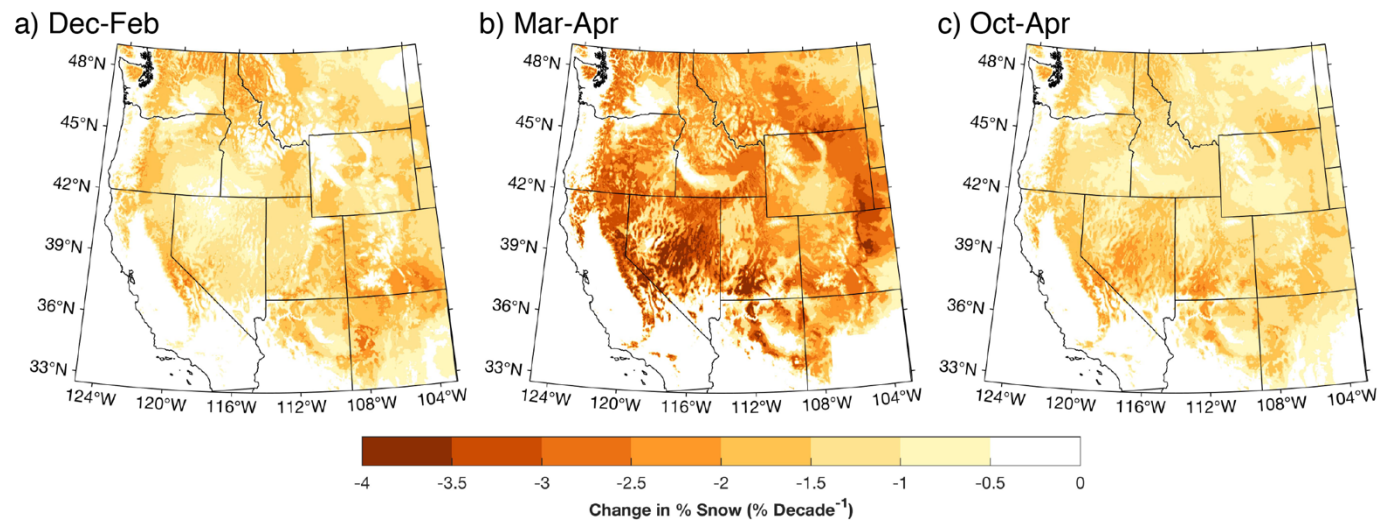

**Supplementary Figure 2: Decadal trends in %<sub>SNOW</sub> for the western United States during (a) winter (Dec-Feb), (b) spring (Mar-Apr), and (c) for the cool season of the water year (Oct-Apr) for all gridpoints.**
